# Supplementary material for: Artificial intelligence-supported lung cancer detection by multi-institutional readers with multi-vendor chest radiographs: a retrospective clinical validation study
Source: PubMed Central journal article supplement (PMC8524996; doi:10.1186/s12885-021-08847-9), 2021-10-18
Supplement: 12885_2021_8847_MOESM4_ESM.pdf [file 12885_2021_8847_MOESM4_ESM.pdf]

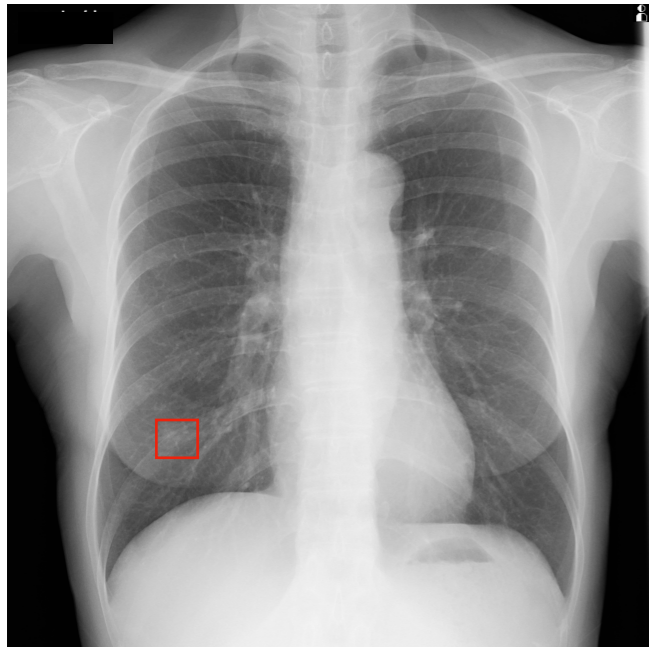

Ground truth

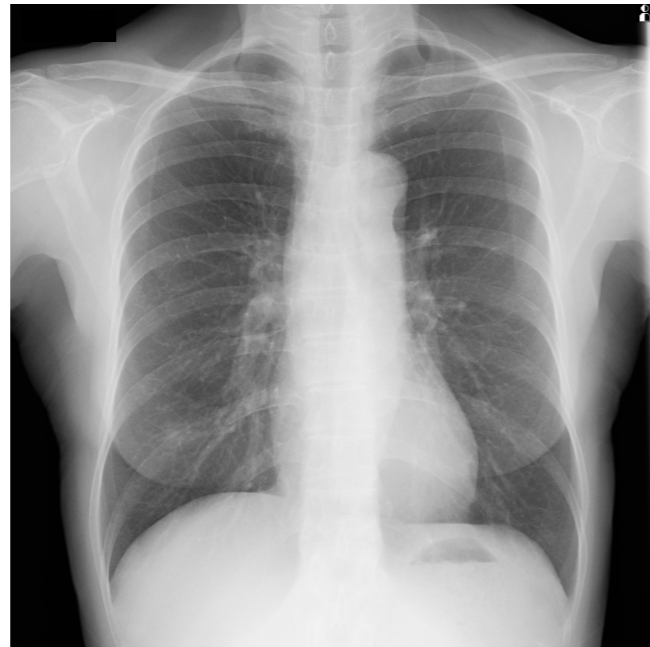

CAD results

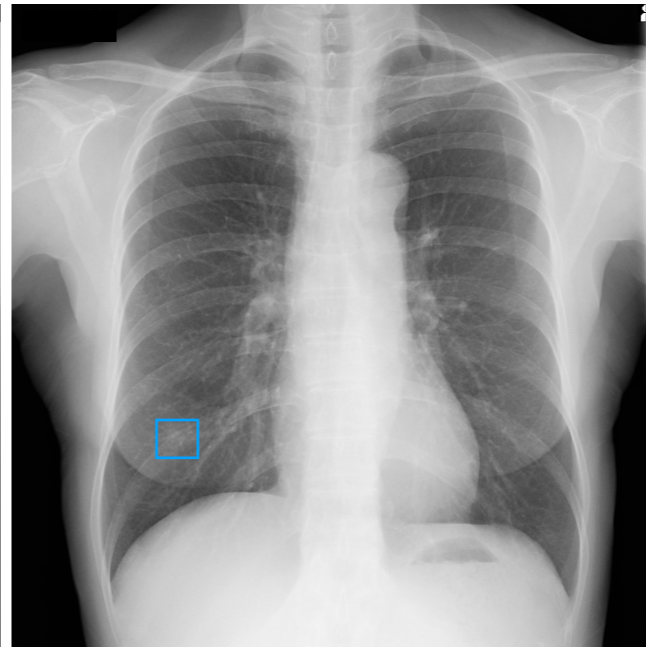

Reader's result before using the CAD

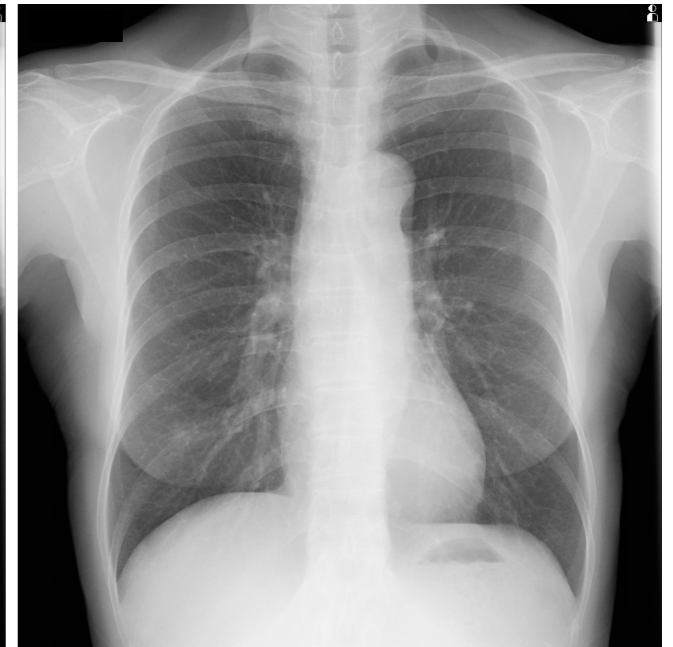

Reader's result after using the CAD
