# Supplementary material for: Artificial intelligence-supported lung cancer detection by multi-institutional readers with multi-vendor chest radiographs: a retrospective clinical validation study
Source: Springer Nature journal article supplement (doi:10.1186/s12885-021-08847-9), 2021-10-18

True positive case  
(IoU  $\geq 0.3$ )

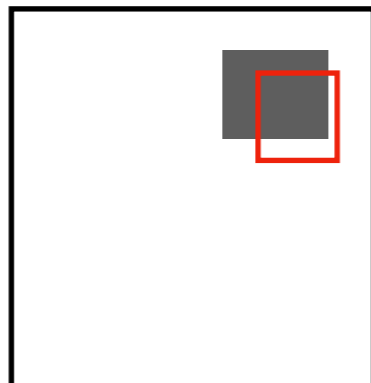

No false positive lesion

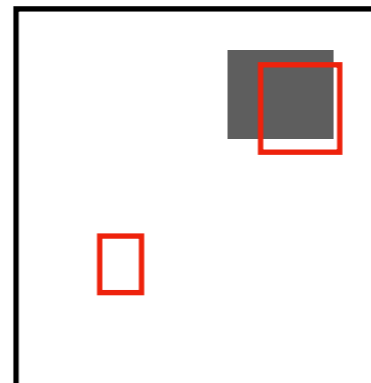

One false positive lesion

False negative case  
(IoU  $< 0.3$ )

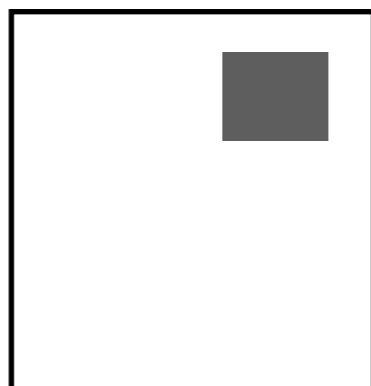

No false positive lesion

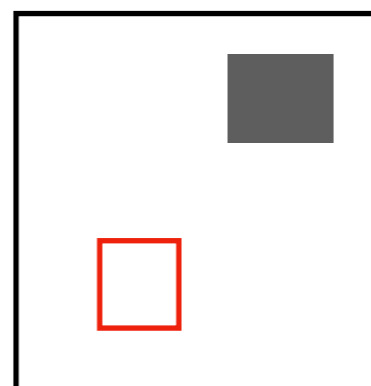

One false positive lesion

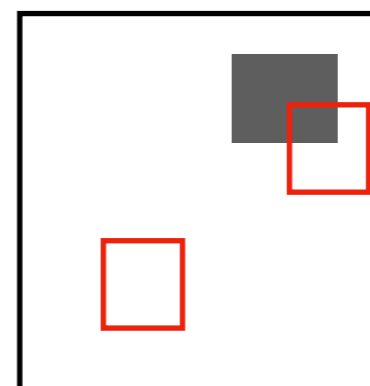

Two false positive lesions

False positive case  
(IoU  $< 0.3$ )

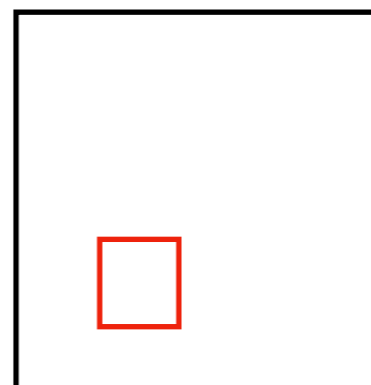

One false positive lesion

True negative case  
(No annotations)

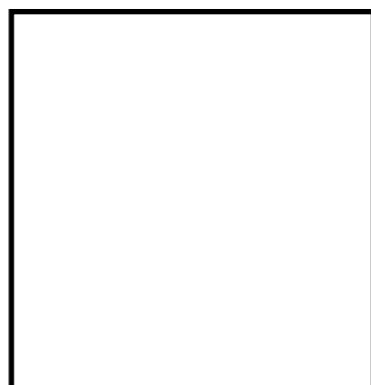

No false positive lesion

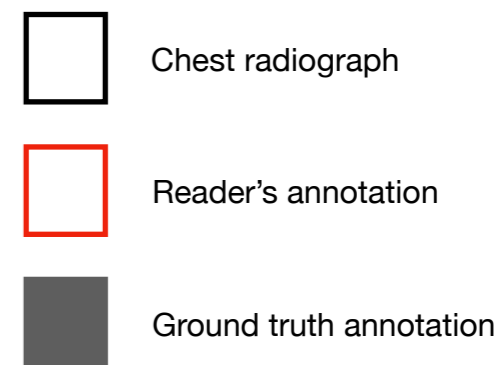

Supplement: MOESM2 [file 19768400]
