# Supplementary material for: Artificial intelligence-supported lung cancer detection by multi-institutional readers with multi-vendor chest radiographs: a retrospective clinical validation study
Source: Springer Nature journal article supplement (doi:10.1186/s12885-021-08847-9), 2021-10-18
Supplement: MOESM5 [file 19768400]

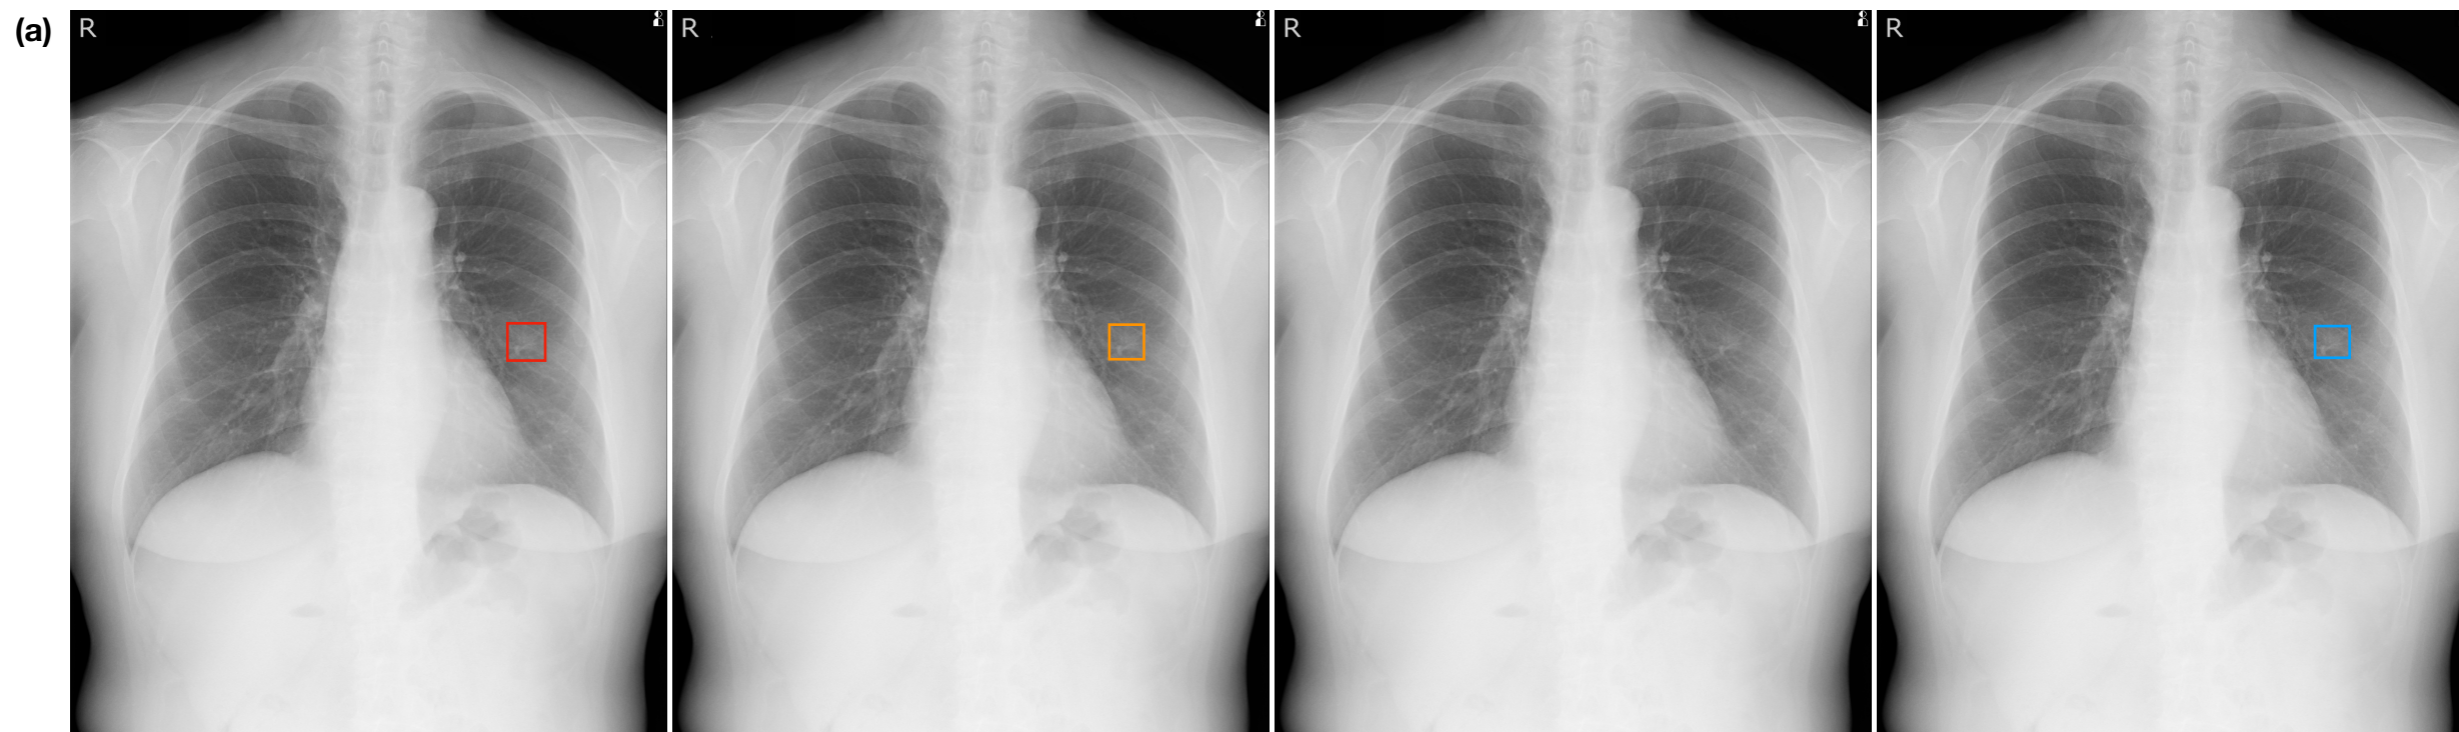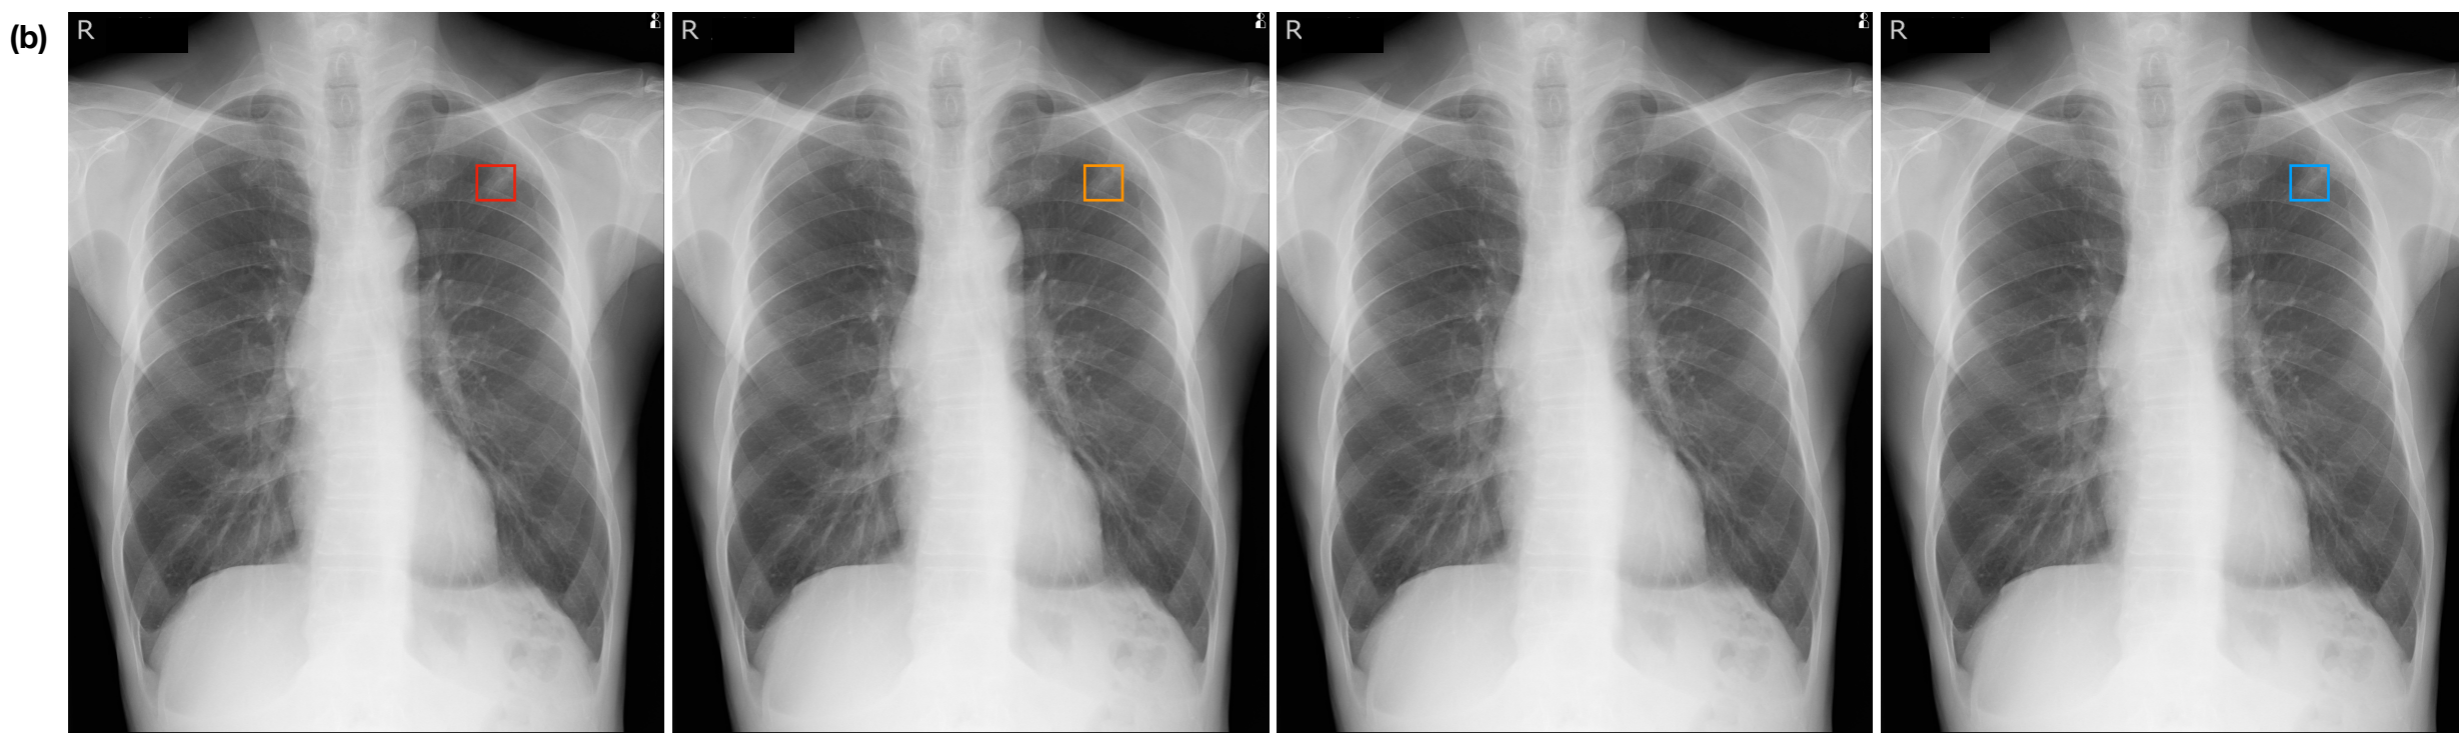

Ground truth

CAD results

Reader's result before using the CAD

Reader's result after using the CAD
